# Supplementary material
Source: Research Square preprint supplement (doi:10.21203/rs.3.rs-9260603/v1)
Supplement: Supplementary file 1 [file e6108c1bc3336c630852ba80.docx]

Appendix A

Appendix A.1

Table A1 provides the detail description of the co-variates included in this study.

**Table A1.** Details of the Co-Variates included in the Study

| Domain | Questions in the survey | Variable Categories |
| --- | --- | --- |
| (1) Individual-level factors | 1. Respondent Birth Month/Year 2. What sex were you assigned at birth, on your original birth certificate? 3. Sexual Self Identification: Please choose the description that best fits how you think about yourself. 4. Which of the following best describes your race? 5. What is the highest level of education that you have achieved to date? 6. What was the total household income before taxes and deductions in the last calendar year for all household members who contribute to household expenses? 7. How would you describe your current plans for having a child with your partner? | 1. Age (numerical) 2. Sex (male/female) 3. Sexual Identification (Heterosexual/ Bisexual/ Homosexual) 4. Race/Ethnicity (White/Black/Other/Hispanic) 5. Education (Less than high school graduate/High school graduate/GED/Some college or associate's degree/Bachelor's degree or higher/Graduate or professional degree) 6. Income (below $25,000/$25,000 to$50,000/$50,000 to $100,000/ More than $100,000) 7. Reproductive Intentions/Plan for a child (Yes/ Maybe/No) |
| (2) Interpersonal-level factors | 1. Are you currently married or living with a romantic or sexual partner? 2. As far as you know, during this relationship, has/did your partner ever had/have any other sexual partners? Or, during the time you and your partner have had a sexual relationship, has/did you ever had/have any other sexual partners? 3. In the last year of this relationship, how often did your partner push or shove you, or throw something at you that could hurt? Or slap, hit or kick you? Or, have an injury, such as a sprain, bruise, or cut because of a fight with your partner? Or, insist on or make you have sexual relations with him/her when you did not want to? 4. In the last year of this relationship, how often did you push or shove, or throw something at your partner that could hurt? Or, slap, hit or kick your partner? Or, your partner had an injury, such as a sprain, bruise, or cut because of a fight with you? Insist on or make your partner have sexual relations with you when they did not want to? | 1. Living with Partner (Yes/No) 2. Concurrent relationship (Yes/No) 3. Partner Violence Victim (Yes/No) 4. Partner Violence Perpetrator (Yes/No) |
| (3) Organizational and societal-level factors | 1. What is your present religion? 2. Which of the following best describes your current health insurance situation? (If they have any insurance described; we categorized them to have an insurance, and response as ‘I have no health insurance’ was categorized not having an insurance) 3. Think of this ladder as representing where people stand in the US. At the top of the ladder (step 10) are the people who have the most money and education, and most respected jobs. At the bottom of the ladder (step 1) are the people who have the least money and education, and the least respected jobs or no job. Where would you place yourself on this ladder? Pick the number for the step that shows where you think you stand at this time in your life, relative to other people in the United States. | 1. Religion (Atheist, Protestant, Catholic, Other Christian, Other) 2. Insurance coverage (Yes/No) 3. Perceived socioeconomic standing/Socio-economic ladder (Less and equal to 5/ More than 5) |
